# Supplementary material
Source: publisher figshare collection journal article supplement (https://acs.figshare.com/ndownloader/files/4482445)

## Supporting Information

**Transport Effects in the Electrooxidation of Methanol  
Studied on Nanostructured Pt/Glassy Carbon Electrodes**

Y.E. Seidel<sup>1</sup>, A. Schneider<sup>1</sup>, Z. Jusys<sup>1</sup>, B. Wickman<sup>2</sup>, B. Kasemo<sup>2</sup>, and R.J. Behm<sup>1\*</sup>

<sup>1</sup>Institute of Surface Chemistry and Catalysis, Ulm University, D-89069 Ulm, Germany

<sup>2</sup>Departement of Applied Physics, Chalmers University of Technology, S-41296 Gothenburg,  
Sweden

Table S1      CO<sub>2</sub> current efficiencies on polycrystalline Pt bulk electrodes (geom. surface area 0.283 cm<sup>2</sup>) after one minute after the potential was stepped from E<sub>int</sub> to E<sub>fin</sub>. *c* concentration of CH<sub>3</sub>OH in 0.5 M H<sub>2</sub>SO<sub>4</sub>; *v* electrolyte flow rate.

| E <sub>int</sub> | E <sub>fin</sub> | <i>c</i>               | <i>v</i>              | <i>A</i> <sub>CO<sub>2</sub></sub> |
|------------------|------------------|------------------------|-----------------------|------------------------------------|
| [V]              | [V]              | [mol L <sup>-1</sup> ] | [μL s <sup>-1</sup> ] | [%]                                |
| 0.05             | 0.65             | 0.001                  | 10                    | 55 <sup>*</sup>                    |
| 0.05             | 0.75             | 0.01                   | 1.1                   | 49 <sup>*</sup>                    |
| 0.05             | 0.60             | 0.1                    | 1.9                   | 18 <sup>*</sup>                    |
| 0.05             | 0.60             | 0.1                    | 8.3                   | 16 <sup>*</sup>                    |
| 0.06             | 0.66             | 0.1                    | 1                     | 32                                 |
| 0.06             | 0.66             | 0.1                    | 10                    | 30                                 |
| 0.06             | 0.76             | 0.1                    | 1                     | 35                                 |
| 0.06             | 0.76             | 0.1                    | 10                    | 32                                 |

<sup>\*</sup> These values are taken from Wang et al., *J. Appl. Electrochem.* **2001**, 31, 759.

Figure S1 Continuous potentiostatic electrooxidation of methanol in 0.1 M  $\text{CH}_3\text{OH}$  containing 0.5 M  $\text{H}_2\text{SO}_4$  at  $10 \mu\text{L s}^{-1}$  on *pc Pt* (black squares) and on HCL-prepared *HCL-17* (red circles) and *HCL-04* (blue triangles) electrodes. Top panel: Faradaic currents; bottom panel: mass spectrometric currents at  $m/z = 60$  for detection of methylformate. The potential was stepped from 0.06 V ( $t_{\text{init}} = 30 \text{ s}$ ) to 0.76 V ( $t_{\text{fin}} = 300 \text{ s}$ ).

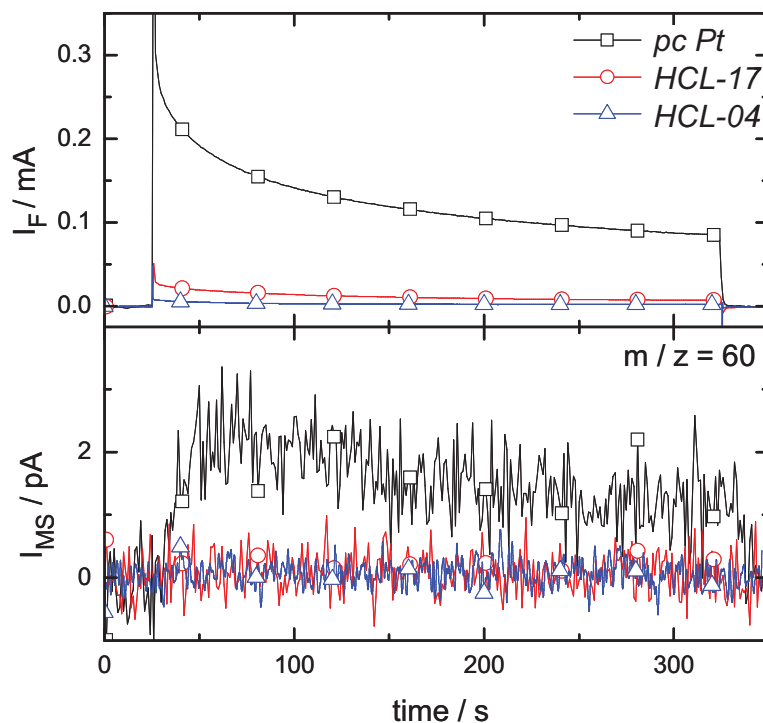

Figure S2 CO<sub>2</sub> current efficiency during continuous potentiodynamic electrooxidation of methanol in 0.1 M CH<sub>3</sub>OH containing 0.5 M H<sub>2</sub>SO<sub>4</sub> on (a) *pc Pt* (black squares) and HCL-prepared electrodes, namely *HCL-17* (red circles) and *HCL-04* (blue triangles) at 10  $\mu\text{L s}^{-1}$  electrolyte flow rate; (b) on a nanostructured *HCL-17* electrode at different flow rates (1  $\mu\text{L s}^{-1}$  – blue, triangles; 10  $\mu\text{L s}^{-1}$  – red, circles; 30  $\mu\text{L s}^{-1}$  – black, squares). Positive-going scan – filled symbols, negative-going scan – blank symbols.

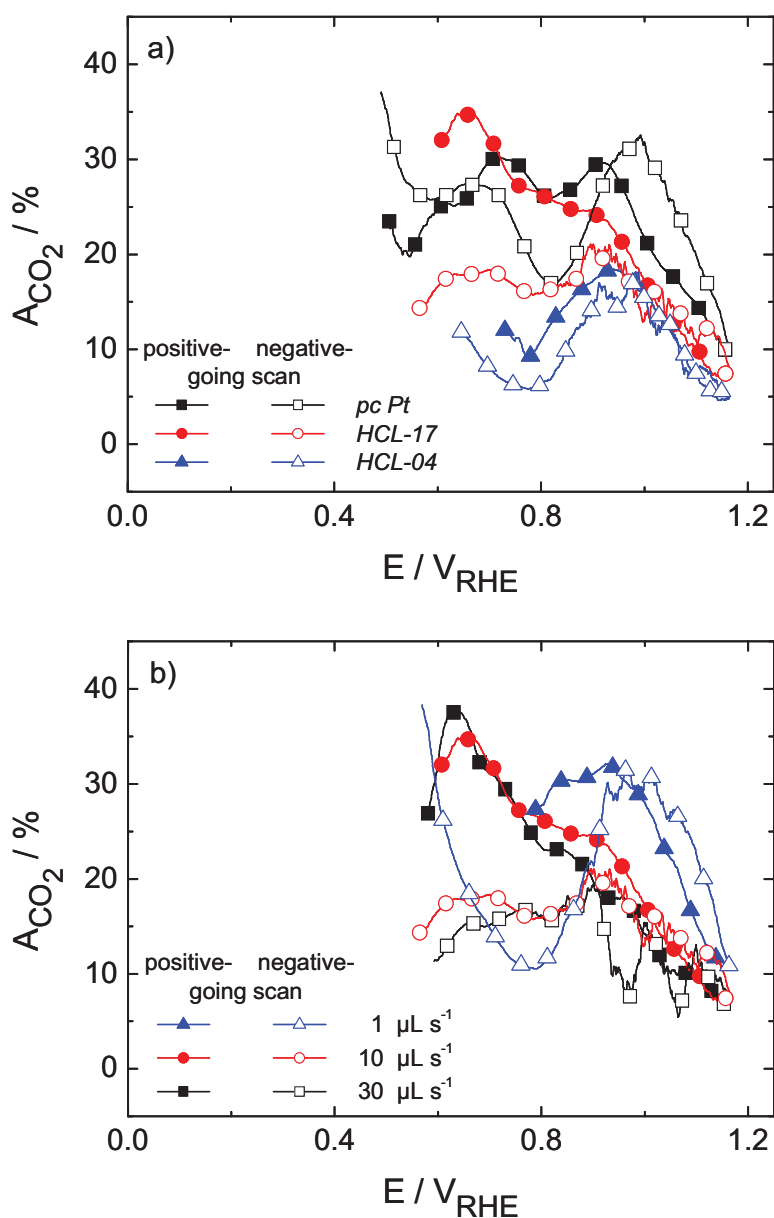

Supplement: Supplementary file 1 [file 4482445]
